# Supplementary material
Source: MDPI journal article supplement (https://www.mdpi.com/2036-7449/14/6/93)
Supplement: s1 [file s1]

The antibody levels were transformed on a Log10 scale, to normalize their distribution [1, 2]. A linear regression model was used to assess associations between log-transformed IgG antibody titers and the following variables: age, gender, vaccine type, side effects after 1<sup>st</sup> dose of vaccine, side effects after 2<sup>nd</sup> dose of vaccine, age when hemodialysis started, and time period from dialysis to the 2<sup>nd</sup> dose of vaccine.

**Supplementary Table 1.** Multivariable analysis assessing factors associated to antibody levels after the full vaccination in dialysis patients, N = 310.

| Variable                                               | Beta coefficient (SE) | p-value |
|--------------------------------------------------------|-----------------------|---------|
| Age (years)                                            | -0.008 (0.004)        | 0.020   |
| Gender                                                 |                       |         |
| Male                                                   | Ref.                  |         |
| Female                                                 | -0.123 (0.096)        | 0.202   |
| Vaccine                                                |                       |         |
| Pfizer/Biontech                                        | Ref.                  |         |
| Moderna                                                | 0.469 (0.227)         | 0.040   |
| Side effects after the second dose of COVID-19 vaccine |                       |         |
| No                                                     | Ref.                  |         |
| Yes                                                    | 0.242 (0.100)         | 0.016   |

1. Rus, K.R., et al., *Performance of the rapid high-throughput automated electrochemiluminescence immunoassay targeting total antibodies to the SARS-CoV-2 spike protein receptor binding domain in comparison to the neutralization assay*. Journal of Clinical Virology, 2021. **139**: p. 104820.
2. Sormani, M.P., et al., *Effect of SARS-CoV-2 mRNA vaccination in MS patients treated with disease modifying therapies*. EBioMedicine, 2021. **72**: p. 103581.
